# Supplementary material
Source: HighWire-hosted journal article supplement (https://erj.ersjournals.com/content/51/5/1800445)
Supplement: inline-supplementary-material-1 [file inline-supplementary-material-1.pdf]

## Supplementary Material

---

|                                     |                                    |
|-------------------------------------|------------------------------------|
| Coordinator of the RIETE Registry:  | Dr. Manuel Monreal (Spain)         |
| RIETE Steering Committee Members:   | Dr. Hervé Decousus (France)        |
|                                     | Dr. Paolo Prandoni (Italy)         |
|                                     | Dr. Benjamin Brenner (Israel)      |
| RIETE National Coordinators:        | Dr. Raquel Barba (Spain)           |
|                                     | Dr. Pierpaolo Di Micco (Italy)     |
|                                     | Dr. Laurent Bertoletti (France)    |
|                                     | Dr. Inna Tzoran (Israel)           |
|                                     | Dr. Abilio Reis (Portugal)         |
|                                     | Dr. Henri Bounameaux (Switzerland) |
|                                     | Dr. Radovan Malý (Czech Republic)  |
|                                     | Dr. Philip Wells (Canada)          |
|                                     | Dr. Peter Verhamme (Belgium)       |
| RIETE Registry Coordinating Center: | S & H Medical Science Service      |

---
